# Supplementary material for: MoS2 nanosheets coupled on Ti3C2Tx prepared by molten salt etching for enhancing lithium storage performance
Source: Royal Society of Chemistry journal article supplement (doi:10.1039/d4qm00388h), 2024-01-01
Supplement: d4qm00388h1.pdf [file d4qm00388h1.pdf]

## Supplementary Material

### **MoS<sub>2</sub> nanosheets coupled on Ti<sub>3</sub>C<sub>2</sub>T<sub>x</sub> prepared by molten salt etching for enhancing lithium storage performance**

Shaochen Wang <sup>a,#</sup>, Chenwei Qu <sup>a,#</sup>, Xin Wang <sup>a</sup>, Daoyong Lin <sup>a</sup>, Tiantian Cao <sup>b,\*</sup>, Guoyong Huang <sup>a,\*</sup>, Shengming Xu <sup>c</sup>

<sup>a</sup> *State Key Laboratory of Heavy Oil Processing, College of New Energy and Materials, China University of Petroleum (Beijing), Beijing 102249, China*

<sup>b</sup> *SINOPEC Research Institute of Petroleum Processing Co.,LTD, Beijing 100083, China*

<sup>c</sup> *Institute of Nuclear and New Energy Technology, Tsinghua University, Beijing 100084, China*

## **Materials Characterization**

The structure and phase purity of the synthesized materials were assessed through X-ray diffraction (XRD) employing Cu K $\alpha$  radiation. The morphological details, grain size, and microstructure of the materials were examined using scanning electron microscopy (SEM, SU 8020, Hitachi), transmission electron microscopy (TEM, Tecnai G2F20), and high-resolution TEM (HR-TEM). X-ray photoelectron spectroscopy (XPS) analysis was conducted using a Thermo Scientific ESCALAB 250 with Al K $\alpha$  as the excitation source.

## **Electrochemical measurements**

The electrochemical performance of the as-prepared materials was evaluated using CR2032 coin-type cells where Li foil served as the counter electrode. The working electrode was fabricated by mixing the as-prepared material, acetylene carbon black, and polyvinylidene fluoride (PVDF) in a weight ratio of 8:1:1 in a certain amount of N-Methylpyrrolidone (NMP). The uniformly mixed slurry was spread on a Cu foil and dried at 80 °C for 12 h under vacuum. The coating thickness of materials is about 100  $\mu\text{m}$ . The assembly of the coin cells was carried out in an argon-filled glove box using polypropylene membrane (Celgard 2400) as the separator and 1 M LiPF<sub>6</sub> dissolved in an organic solvent with EC/DMC/EMC = 1:1:1 as the electrolyte. The charge and discharge measurements were carried out on a LAND-CT2001C test system at different current densities. Cyclic voltammogram experiments were performed on an Autolab PGSTAT302N electrochemical workstation at various scan rates.

## **Density functional theory (DFT) simulations**

The simulations were performed using the Density Functional Theory (DFT) implemented in the Cambridge Sequential Total Energy Package (CASTEP). The Perdew-Burke-Ernzerhof (PBE) exchange-correlation function of the generalized gradient approximation (GGA) was employed for calculations, and ultrasoft pseudopotentials were used for ion-electron interactions. The energy cutoff was set to 500 eV to achieve energy convergence down to  $1 \times 10^{-5}$  eV. The Brillouin zone was sampled using the Monkhorst-Pack method. For diffusion pathway calculations, the transition state search method was applied, including complete linear synchronous transit and quadratic synchronous methods. The atomic structures and electron density differences were visualized using VESTA.

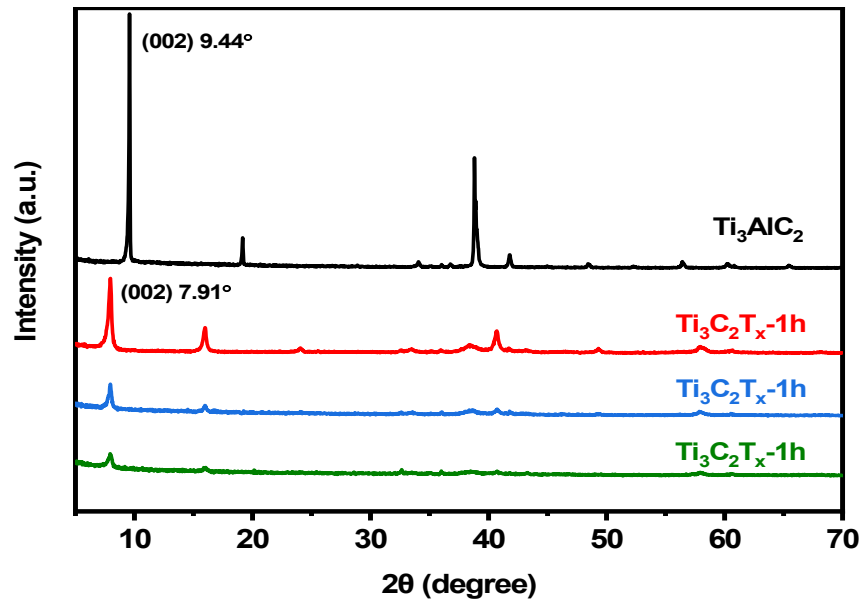

Fig. S1. XRD of  $\text{Ti}_3\text{AlC}_2$  and  $\text{Ti}_3\text{C}_2\text{T}_x$

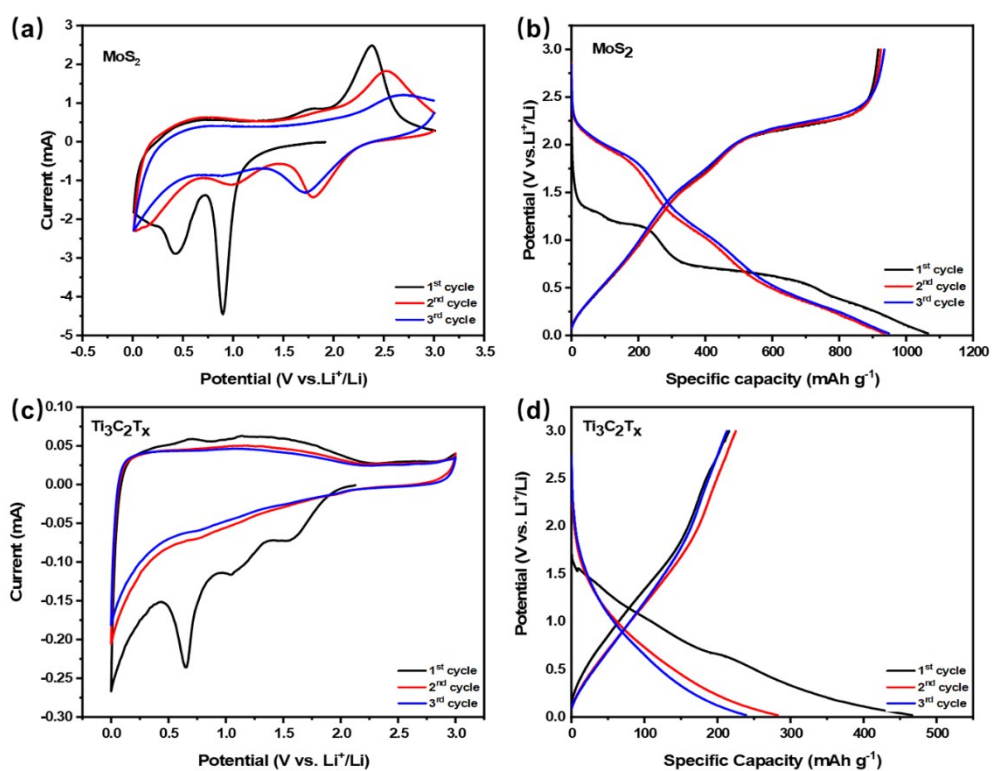

Fig. S2. CV curves of (a)  $\text{MoS}_2$  and (c)  $\text{Ti}_3\text{C}_2\text{T}_x$ ; Charge and discharge curves of (b)  $\text{MoS}_2$  and (d)  $\text{Ti}_3\text{C}_2\text{T}_x$

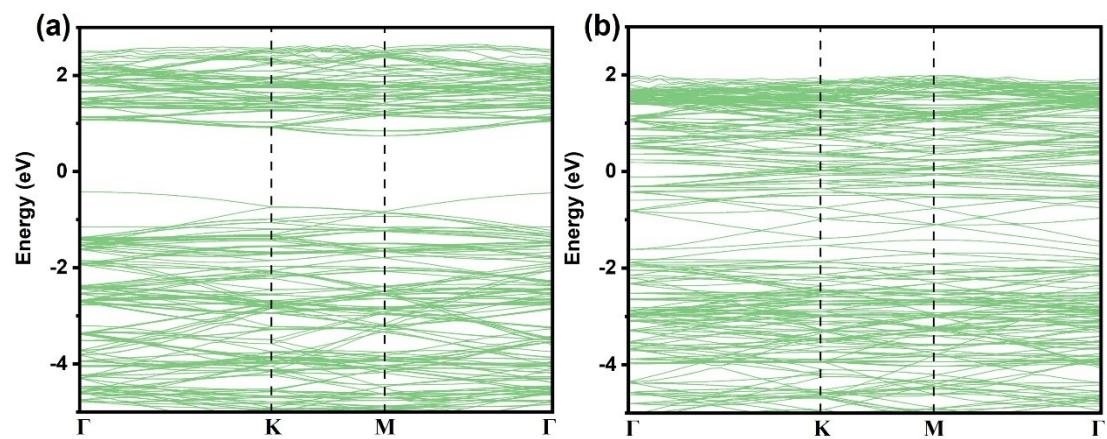

Fig. S3. Band curves of (a) MoS<sub>2</sub> and (b) MoS<sub>2</sub>/Ti<sub>3</sub>C<sub>2</sub>T<sub>x</sub>

**Table. S1. A comparison of the cycling performance of MoS<sub>2</sub>/Ti<sub>3</sub>C<sub>2</sub>T<sub>x</sub> with the recently reported MoS<sub>2</sub> anode materials for Li-ion batteries in other literature.**

| Materials                                                       | Capacity (mAh·g <sup>-1</sup> ) | Density (mA·g <sup>-1</sup> ) | Cycles | Ref.      |
|-----------------------------------------------------------------|---------------------------------|-------------------------------|--------|-----------|
| MoS <sub>2</sub> /Ti <sub>3</sub> C <sub>2</sub> T <sub>x</sub> | 460.6                           | 100                           | 100    | This work |
| Exfoliated MoS <sub>2</sub> nanosheets                          | 385                             | 100                           | 100    | [1]       |
| N-doped carbon nanofiber@MoS <sub>2</sub> nanosheets            | 495                             | 100                           | 100    | [2]       |
| MoS <sub>2</sub> nanosheets aligned on carbon paper             | 286                             | 100                           | 80     | [3]       |
| MoS <sub>2</sub> /graphene                                      | 573                             | 100                           | 50     | [4]       |
| f-MoS <sub>2</sub> /C-3                                         | 307                             | 500                           | 50     | [5]       |

[1] Y. Li, K. Chang, E. Shangguan, D. Guo, W. Zhou, Y. Hou, H. Tang, B. Li, Z. Chang, Powder exfoliated MoS<sub>2</sub> nanosheets with highly monolayer-rich structures as high-performance lithium-/sodium-ion-battery electrodes, *Nanoscale*, 2019, 11, 1887-1900.

[2] J. Liang, Z. Wei, C. Wang, J. Ma, Vacancy-induced sodium-ion storage in n-doped carbon nanofiber@MoS<sub>2</sub> nanosheet arrays, *Electrochim. Acta*, 2018, 285, 301-308.

[3] X. Xie, T. Makaryan, M. Zhao, K.L. Van Aken, Y. Gogotsi, G. Wang, MoS<sub>2</sub> nanosheets vertically aligned on carbon paper: A freestanding electrode for highly reversible sodium-ion batteries, *Adv. Energy Mater.*, 2016, 6, 1502161.

[4] B. Zhao, Z. Wang, Y. Gao, L. Chen, M. Lu, Z. Jiao, Y. Jiang, Y. Ding, L. Cheng, Hydrothermal synthesis of layer-controlled MoS<sub>2</sub>/graphene composite aerogels for lithium-ion battery anode materials, *Appl. Surf. Sci.*, 2016, 390, 209-215.

[5] G.-H. Lee, S.-J. Kim, M.-C. Kim, H.-S. Choe, D.-M. Kim, S.-B. Han, D.-H. Kwak,

J.H. Jeong, K.-W. Park, In situ formation of MoS<sub>2</sub>/c nanocomposite as an anode for high-performance lithium-ion batteries, RSC Adv., 2016, 6, 92259-92266.
